# Supplementary material
Source: PubMed Central journal article supplement (PMC3918804)
Supplement: 1313096111_sapp.pdf [file 1313096111_sapp.pdf]

# SUPPORTING INFORMATION

## Appendix

for

### **The CRL4-like Clr4 Complex in *S. pombe* depends on an exposed surface of Dos1 for heterochromatin silencing**

Canan Kuscua<sup>a,b,c</sup>, Mikel Zaratiegui<sup>c,1</sup>, Hyun Soo Kim<sup>c</sup>, David A. Wah<sup>a,c,d</sup>, Robert A. Martienssen<sup>c,d,e</sup>, Thomas Schalch<sup>a,c,2,3</sup>, and Leemor Joshua-Tor<sup>a,c,d,3</sup>

<sup>a</sup>W. M. Keck Structural Biology Laboratory, 1 Bungtown Road, Cold Spring Harbor, NY 11724, USA

<sup>b</sup>PhD program in Biochemistry and Structural Biology, Stony Brook University, Stony Brook, NY 11794, USA

<sup>d</sup>Howard Hughes Medical Institute and <sup>e</sup>Gordon and Betty Moore Foundation, <sup>c</sup>Cold Spring Harbor Laboratory, 1 Bungtown Road, Cold Spring Harbor, NY 11724, USA

<sup>1</sup>Current address: Department of Molecular Biology and Biochemistry, Rutgers University, Piscataway, NJ 08854, USA

<sup>2</sup>Current address: Department of Molecular Biology, Science III, University of Geneva, CH-1211 Geneva, Switzerland

Correspondence:

Leemor Joshua-Tor ([leemor@cshl.edu](mailto:leemor@cshl.edu)) and Thomas Schalch ([thomas.schalch@unige.ch](mailto:thomas.schalch@unige.ch))

## SI Materials and Methods

### Strains

ZB677: h-, Delta-dos1::KanMX6, ade6-M216, ura4D18, otr1L(SphI)::ura4+, leu1-32

### Plasmids

For the pairwise interaction screen and protein expression, plasmids were cloned by Sequence Ligation Independent Cloning (SLIC) using standard procedures (1). The complete list of plasmids that were used for protein expression in insect SF9 cells can be found in **Table S3**. The pairwise interaction screen was designed taking advantage of the MultiBac expression system in insect cells (2). Except for the *Clr4* gene, all the others were codon optimized for insect cell expression (Mr. Gene GmbH, Regensburg, Germany). Since there are no antibodies available against any of the CLRC components, one of each pair was cloned with a modified N-terminal One STrEP Sumo (OSS) tag (IBA) in a pFL vector (3) and the other one was cloned with either an N-terminal or a C-terminal FLAG tag in a pUCDM vector. To express the Dos1WD (213-638) and Dos1 $\Delta$ N (66-638) proteins, the corresponding codon optimized cDNAs were cloned into a pFL vector with a TEV cleavage site between the OSS tag and the protein (4).

For functional assays in *S. pombe*, the prep41-HA-Dos1 plasmid was built by amplifying *dos1* cDNA from pBSdos1 (5) with primers that had the BamHI (reverse) and Sall (forward) sites. The forward ones were designed to provide in-frame cloning with the HA tag, so that the HA is N-terminal. The PCR product was then inserted into a prep41-HAN vector (6) between the Sall and BamHI restriction enzyme sites. All mutants were cloned using the SLIC method described above with primers designed to anneal to the mutation sites as well as primers

designed to anneal to the vector backbone outside of the *dos1* gene. The complete list of *Dos1* truncations and mutants can be found in **Table S4**.

### **Protein expression and purification**

To express protein pairs from one virus for the pairwise interaction screen, corresponding plasmids were fused using Cre recombination, integrated into the baculovirus genome and expressed according to a published procedure (2). The initial viruses were collected after 3-4 days.  $5 \times 10^7$  cells in suspension were infected with 500ul of initial virus to co-express the proteins. The cells were collected 48 hrs after infection and flash frozen in liquid nitrogen. Full-length Rik1 is problematic due to its very low solubility. To overcome this problem, we designed a truncated version of Rik1 in which we deleted the second WD40 domain by linking Alanine 377 to Leucine 664 in Rik1 according to a homology model based on the DDB1 structure. This new version was cloned into pFL-OSS, expressed as described above and used in pull down assays with *Dos1* truncations (see Fig. 2B) as described below.

For *Dos1* expression and purification, the bacmid DNA was purified from pFL-OSS-*Dos1* plasmid-transformed DH10MultiBAC cells with an alkaline lysis followed by isopropanol precipitation and transfected into SF-9 cells to generate viruses. Viruses were amplified by infecting SF-9 cells with a 1:1000 dilution of initial virus ( $V_0$ ) from the previous stage and incubating cells at 27°C for 3-4 days ( $V_1$ ). For protein expression, cells around  $2 \times 10^6$  concentration were infected with a 1:100 (v/v) ratio of  $V_1$ , harvested 48-60 hr post infection, resuspended in 5-10 ml of PBS per 1 L of cells and flash frozen in liquid nitrogen.

Prior to initial purification, cells were thawed in a water bath at 25°C and lysis buffer (100 mM HEPES pH 7.6, 200 mM KCl, 5 mM DTT, 5 mM  $MgCl_2$ ) was added at 2:1 (v/w)

supplemented with 1X protease inhibitors (16 $\mu$ g/ml benzamidine HCl, 10  $\mu$ g/ml phenanthroline, 10  $\mu$ g/ml aprotinin, 10  $\mu$ g /ml leupeptin, 10  $\mu$ g /ml Pepstatin A, 1 mM PMSF) and 1:50 v/v TurboNuclease (Accelagen). Cells were incubated on a shaker for 15 min for complete lysis. After centrifugation for 45 min at 142,000 x g at 4°C, the supernatant was decanted and incubated on a roller at 4°C for 1 hr with 0.5 ml lysis buffer equilibrated with Strep-Tactin resin. The beads were washed 3 times with 5 column volumes (CV) of lysis buffer supplemented with 5 mM ATP to remove chaperones and 5 times with 5 CV lysis buffer. The protein was eluted in 3 steps with 1 ml lysis buffer supplemented with 2.5 mM desthiobiotin. SUMOstar protease (LifeSensors) was used to cleave the tag. However, complete cleavage could not be achieved even with an increased amount of protease. Subsequent constructs therefore included a TEV site for tag cleavage. The protein was further purified from uncleaved fusion with anion exchange chromatography using MonoQ column with a salt gradient from 0.1-1 M KCl (MQ buffer), and size exclusion chromatography using Superdex 200 column equilibrated in GF buffer (50 mM HEPES pH 7.6, 200 mM KCl, 2 mM DTT).

Dos1WD and Dos1 $\Delta$ N fragments were expressed in insect cells as described above, except that Hi5 cells were used instead of SF-9 cells, yielding ~5 times more protein per liter of cells. The protocol for selenomethionine labeled protein expression was modified from (7). The minor changes are: 1) Hi5 cells were used to express the protein; 2) The media was changed to methionine free media 6 hr after infection; 3) 200 mg/L selenomethionine was added 10 hr after infection. The initial protein purification for Dos1WD and Dos1 $\Delta$ N was the same as above except that the tag was cleaved on the column by incubating the resin with 1:100 dilution of TEV protease overnight at 4°C. The untagged protein was eluted and subjected to anion exchange and



size exclusion chromatography in MQ and GF buffers supplemented with 10 mM DTT instead of 2 mM DTT.

### **Size exclusion chromatography analysis**

To test for proper folding and stability of the Dos1 K489A/D490A mutant, we used size exclusion chromatography. Wild type and mutant proteins were expressed and purified by streptactin affinity purification as described above. 200 $\mu$ l of 2mg/ml protein of each construct was loaded onto a Superdex 200 16/60 (GE Healthcare) column and 0.5ml fractions were collected. The peak fractions were loaded into a NuPAGE gel and analyzed by commassie blue staining.

### **Pull down assays**

For pull down assays using Strep-Tactin beads (IBA), SF-9 cells expressing pairs of CLRC complex subunits were lysed in 1 ml lysis buffer supplemented with 1X protease inhibitors. Cells were centrifuged at 18,000 x g for 20 min, and the supernatant was incubated with 100  $\mu$ l Strep-Tactin beads equilibrated with 5 CV of lysis buffer for 1hr at 4°C. The beads were washed with 5 CV lysis buffer supplemented with 5 mM ATP to remove chaperones, and twice with 5 CV lysis buffer. The proteins were eluted in 200  $\mu$ l lysis buffer supplemented with 2.5 mM desthiobiotin and subjected to western blot analysis. 10 $\mu$ g of total input protein were loaded into an 8% NuPAGE gel, and elutions normalized as indicated in the figures. Gels were semi-dry blotted on a nitrocellulose membrane at 150 mA for 1 hr. To prevent cross contamination of signals from secondary antibodies, sequential western blotting was used. For the first western, the membrane was incubated in 10 ml Odyssey Blocking Buffer (LI-COR

Biosciences) overnight at 4°C by shaking. This was followed by incubation with FLAG antibody (Sigma-Aldrich) at 1:5000 dilution in 20% Odyssey blocking buffer for 1hr at room temperature (RT). The membrane was then washed 3 times with 1X PBS-T with 5 min incubations. Donkey anti-rabbit IRDye 800CW (LI-COR Biosciences) with 1:10000 dilution in 20% Odyssey blocking buffer was used. The membrane was then washed 3 times with 1X PBS-T with 5 min incubations, and once in 1X PBS before scanning (Odyssey). The membrane was stripped at least twice with stripping buffer (25 mM glycine pH 2.0, 1.5% SDS) and washed with 1X PBS-T and 1X PBS. After confirming with a quick scan on the Odyssey, a second western was started with 1hr incubation in Odyssey blocking buffer. It was incubated with STREP MAB Classic antibody (IBA) using a 1:1000 dilution and tubulin antibody at 1:5000 dilution (abcam) in 20% Odyssey blocking buffer for 1hr at room temperature (RT). The membrane was then washed 3 times with 1X PBS-T with 5 min incubations. Goat anti-mouse IRDye 800CW (LI-COR Biosciences) at a 1:10000 dilution and Goat anti-rat IRDye 680CW (LI-COR Biosciences) in 20% Odyssey blocking buffer was used as a secondary detection. The membrane was then washed 3 times with 1X PBS-T with 5 min incubations, and once in 1X PBS before scanning (Odyssey). The membrane was scanned using both 700 and 800 nm channels.

### **Limited proteolysis**

Limited proteolysis was performed with Thermolysin (Sigma) in a 20 µl reaction volume of 10 mM Tris-HCl pH 8.0, 2 mM CaCl<sub>2</sub> and 5% glycerol containing protein:protease ratios of 12.8, 3.2, 0.8, 0.2 and 0.05. After 60 min at 37°C, the reactions were quenched in 1X SDS loading dye (2.5% (w/v) glycerol, 3% (w/v) Triethanolamine, 1% (w/v) SDS, 0.25% (w/v) Ficoll

400, 0.5 mM EDTA, 26% (w/v) Brilliant Blue G250). 5  $\mu$ l of samples from each reaction were loaded onto an SDS-PAGE gel for analysis.

### **Crystallization and structure determination**

Diffraction quality crystals were obtained by the hanging drop vapor diffusion method where 5mg/ml Dos1WD in 200 mM KCl, 50 mM HEPES pH 7.5, 2 mM DTT was mixed with an equal volume of the reservoir solution containing 50 mM Tris-HCl (pH 7.0), 0.9 M di-sodium tartrate, 50 mM MgCl<sub>2</sub>. Selenomethionine derivative crystals were obtained under the same conditions. Crystals appeared within 4 days and grew to their final size in 2 weeks. Prior to data collection, selenomethionine labeled crystals were transferred into a cryopreservation solution containing mother liquor supplemented with 25% glycerol added in a stepwise manner, incubated overnight, and frozen in liquid nitrogen. Native crystals were directly transferred into a cryopreservation solution with the addition of 25% ethylene glycol and frozen in liquid nitrogen. Data were collected under cryogenic conditions at the National Synchrotron Light Source (NSLS), Brookhaven National Laboratory, beamline X25 at the selenium peak wavelength (0.9788 Å). The data were processed and scaled with XDS (8). Initial heavy atom positions were identified using the SAD method implemented in Phenix (9) using reflections up to 2.5 Å resolution. The initial model was built using the Autobuild utility in Phenix which was only able to build alanine chains. The complete initial model was built in Coot (10) using this auto-build model as a guide. The structure was further refined against the native dataset up to 2 Å resolution using phenix.refine yielding a model with two molecules per asymmetric unit and excellent geometry (97.5% in favored region and 2.5% in allowed regions). 361 waters, 1 Chloride ion and

100 ethylene glycols were added. Final model building was carried out in Coot and evaluated using the MolProbity server (11). Data and refinement statistics are shown in **Table S2**.

### **Computational analysis**

Structure similarity searches and structure-based sequence alignments were performed using DALI (12). PSI-BLAST (13) was used to identify Dos1WD orthologs using Dos1 residues 213-638. Alignments were done using ClustalW (14) and surface conservations were analyzed using ConSurf (15). PyMOL (Schrödinger) was used for comparison of Dos1WD and CRL4 and other propellers. Electrostatic surface potentials were generated using the APBS plugin in PyMOL (16).

### **Spotting assays, TCA precipitation and western blotting**

The *S. pombe* strains transformed with the indicated mutant plasmid according to (17). Strains were grown to an exponential phase (OD 0.2-0.6) and counted under the microscope. On a sterile 96 well plate, cells were diluted to give  $2 \times 10^3$  cells per  $\mu\text{l}$  of water in the first column (one row per strain) and then diluted in a serial manner over the next 4 columns to make 1:10 dilutions. Dilution range is from  $2 \times 10^3$  to 0.2. 5ul of each dilution were spotted on each plate (-Leu, -Leu-Ura, -Leu+FOA). The concentration of FOA in the plates was 1mg/ml. The plates also contained 0.05  $\mu\text{M}$  thiamine to tune down the expression level of the protein. The plates were not moved until the spots dried completely and then incubated at either 30°C or 37°C for 4 days before pictures were taken. The complete list of Dos1 truncations and mutants, and their effects in *ura4*<sup>+</sup> silencing is shown in **Table S1**.

In order to detect expression of Dos1 truncations and mutants, TCA precipitation was performed with 5ml cultures and grown in PMG –Leu medium supplemented with 0.05  $\mu$ M thiamine to an OD600 of 1.0 according to a published protocol (18). Total protein concentrations were measured and 5  $\mu$ g of total protein was loaded into 8% NuPAGE with addition of 1X SDS sample loading dye after boiling at 95°C for 5 min. Western blotting was done using 12CA5 anti-HA from CSHL in-house facility as a primary and ECL Anti-Mouse IgG (GE Healthcare) as a secondary. Detection was done using a Pierce ECL Western Blotting Substrate.

1. Li MZ & Elledge SJ (2007) Harnessing homologous recombination in vitro to generate recombinant DNA via SLIC. *Nat Methods* 4(3):251-256.
2. Fitzgerald DJ, *et al.* (2006) Protein complex expression by using multigene baculoviral vectors. *Nat Methods* 3(12):1021-1032.
3. Schalch T, Job G, Shanker S, Partridge JF, & Joshua-Tor L (2011) The Chp1-Tas3 core is a multifunctional platform critical for gene silencing by RITS. *Nat Struct Mol Biol* 18(12):1351-1357.
4. Elkayam E, *et al.* (2012) The structure of human argonaute-2 in complex with miR-20a. *Cell* 150(1):100-110.
5. Li F, *et al.* (2005) Two novel proteins, dos1 and dos2, interact with rik1 to regulate heterochromatic RNA interference and histone modification. *Curr Biol* 15(16):1448-1457.
6. Craven RA, *et al.* (1998) Vectors for the expression of tagged proteins in *Schizosaccharomyces pombe*. *Gene* 221(1):59-68.
7. Cronin CN, Lim KB, & Rogers J (2007) Production of selenomethionyl-derivatized proteins in baculovirus-infected insect cells. *Protein Sci* 16(9):2023-2029.
8. Kabsch W (2010) Xds. *Acta Crystallogr D Biol Crystallogr* 66(Pt 2):125-132.
9. Adams PD, *et al.* (2010) PHENIX: a comprehensive Python-based system for macromolecular structure solution. *Acta Crystallogr D Biol Crystallogr* 66(Pt 2):213-221.
10. Emsley P & Cowtan K (2004) Coot: model-building tools for molecular graphics. *Acta Crystallogr D Biol Crystallogr* 60(Pt 12 Pt 1):2126-2132.
11. Chen VB, *et al.* (2010) MolProbity: all-atom structure validation for macromolecular crystallography. *Acta Crystallogr D Biol Crystallogr* 66(Pt 1):12-21.
12. Holm L & Rosenstrom P (2010) Dali server: conservation mapping in 3D. *Nucleic Acids Res* 38(Web Server issue):W545-549.
13. Altschul SF, *et al.* (1997) Gapped BLAST and PSI-BLAST: a new generation of protein database search programs. *Nucleic Acids Res* 25(17):3389-3402.
14. Goujon M, *et al.* (2010) A new bioinformatics analysis tools framework at EMBL-EBI. *Nucleic Acids Res* 38(Web Server issue):W695-699.
15. Ashkenazy H, Erez E, Martz E, Pupko T, & Ben-Tal N (2010) ConSurf 2010: calculating evolutionary conservation in sequence and structure of proteins and nucleic acids. *Nucleic Acids Res* 38(Web Server issue):W529-533.

16. Baker NA, Sept D, Joseph S, Holst MJ, & McCammon JA (2001) Electrostatics of nanosystems: application to microtubules and the ribosome. *Proc Natl Acad Sci U S A* 98(18):10037-10041.
17. Forsburg SL & Rhind N (2006) Basic methods for fission yeast. *Yeast* 23(3):173-183.
18. Keogh MC, *et al.* (2006) A phosphatase complex that dephosphorylates gammaH2AX regulates DNA damage checkpoint recovery. *Nature* 439(7075):497-501.
19. Buscaino A, *et al.* (2012) Raf1 Is a DCAF for the Rik1 DDB1-like protein and has separable roles in siRNA generation and chromatin modification. *PLoS Genet* 8(2):e1002499.

**Table S1:** Results of comparative growth assays using Dos1 mutants.

| Mutant                                 | Phenotype | Mutant                                   | Phenotype | Mutant                      | Phenotype |
|----------------------------------------|-----------|------------------------------------------|-----------|-----------------------------|-----------|
| WT                                     | -         | Dos1 $\Delta$ LIV ( $\Delta$ 531-546)    | ++++      | Dos1 F416A                  | +++       |
| HA-Dos1                                | -         | Dos1 $\Delta$ LIV-v2 ( $\Delta$ 535-546) | ++++      | Dos1 Y450A                  | +         |
| HA-null                                | ++++      | Dos1 N237A/E238A                         | ++        | Dos1 L465A                  | ++        |
| Dos1 T495I                             | ++        | Dos1 V244A                               | ++        | Dos1 T487A/Q488A            | ++        |
| Dos1 R576A                             | ++        | Dos1 V244A/T260A                         | ++        | Dos1 K489A/D490A            | ++++      |
| Dos1 R518A                             | +++       | Dos1 H278A                               | -         | Dos1 I491A/N492A            | ++++      |
| Dos1WD (1-212)                         | ++++      | Dos1 T301A                               | +++       | Dos1 H493A                  | -         |
| Dos1 $\Delta$ WD (213-638)             | ++++      | Dos1 D304A                               | ++        | Dos1 T508A/D509A            | ++++      |
| Dos1 $\Delta$ N (66-638)               | -         | Dos1 F319A                               | +++       | Dos1 N 550A                 | +         |
| Dos1 (139-638)                         | ++++      | Dos1 D320A/N321A                         | N/A       | Dos1 Q553A                  | -         |
| Dos1 (154-638)                         | ++++      | Dos1 T340A/D341A                         | ++        | Dos1 N559A                  | -         |
| Dos1 (173-638)                         | N/A       | Dos1 H344A/K345A                         | +++       | Dos1 Y594A                  | -         |
| Dos1 (194-638)                         | N/A       | Dos1 K359A                               | -         | Dos1 E599A                  | -         |
| Dos1 $\Delta$ LI ( $\Delta$ 261-269)   | ++++      | Dos1 E385A                               | -         | Dos1 $\Delta$ Ctail (1-618) | +++       |
| Dos1 $\Delta$ LII ( $\Delta$ 289-299)  | +++       | Dos1 E388A/K389A                         | -         | Dos1 F626A/F629A            | +++       |
| Dos1 $\Delta$ LIII ( $\Delta$ 415-421) | ++++      | Dos1 E397A                               | +         | Dos1 E628A/E633A            | -         |

The categories of mutants are as follows: strong silencing defect at 30°C (++++); mild silencing defect at 30°C and strong silencing defect at 37°C (+++); strong silencing defect at 37°C (++); mild at 37°C (+); no defect in silencing, same as WT (-); not enough data (N/A).



Table S2: Data collection and refinement statistics

|                                            | <b>Native</b>                 | <b>Selenomethionine derivative</b> |
|--------------------------------------------|-------------------------------|------------------------------------|
| <b>Data collection</b>                     |                               |                                    |
| <b>Space group</b>                         | C2                            | C2                                 |
| <b>Cell dimensions</b>                     |                               |                                    |
| <b>a, b, c (Å), <math>\beta</math> (°)</b> | 121.15, 102.79, 95.09, 122.35 | 122.28, 102.09, 94.25, 122.50      |
| <b>Wavelength (Å)</b>                      | 0.9788                        | 0.9788                             |
| <b>Resolution (Å)<sup>a</sup></b>          | 45.87-2.0 (2.05-2.00)         | 19.9-2.50 (2.56-2.50)              |
| <b>Rmerge (%)</b>                          | 6.0 (34.6)                    | 5.6 (17.2)                         |
| <b>I/<math>\sigma</math>(I)</b>            | 11.9 (3.1)                    | 16.7 (7.5)                         |
| <b>Completeness (%)</b>                    | 99.0 (99.5)                   | 99.2 (99.8)                        |
| <b>Redundancy</b>                          | 3.4 (3.2)                     | 3.5 (3.6)                          |
| <b>Refinement</b>                          |                               |                                    |
| <b>Resolution (Å)</b>                      | 45.87-2.0                     |                                    |
| <b>No. reflections<sup>a</sup></b>         | 65972 (5480)                  |                                    |
| <b>Rwork/Rfree (%)</b>                     | 21.32/25.01                   |                                    |
| <b>No. atoms (non-hydrogen)</b>            | 6470                          |                                    |
| <b>Protein</b>                             | 6084                          |                                    |
| <b>Water</b>                               | 349                           |                                    |
| <b>Ethylene Glycol</b>                     | 36                            |                                    |
| <b>Chloride ion</b>                        | 1                             |                                    |
| <b>&lt;B-factors&gt; (Å<sup>2</sup>)</b>   |                               |                                    |
| <b>Protein</b>                             | 33.80                         |                                    |
| <b>Waters</b>                              | 37.90                         |                                    |
| <b>r.m.s. deviations</b>                   |                               |                                    |
| <b>Bond lengths (Å)</b>                    | 0.011                         |                                    |
| <b>Bond angles (°)</b>                     | 1.22                          |                                    |
| <b>MolProbity Statistics</b>               |                               |                                    |
| <b>All atom clashscore</b>                 | 6.24                          |                                    |
| <b>Ramachandran favored (%)</b>            | 96.74%                        |                                    |
| <b>Ramachandran outliers (%)</b>           | 0                             |                                    |
| <b>Poor rotamers (%)</b>                   | 1.35%                         |                                    |
| <b>MolProbity score</b>                    | 1.64                          |                                    |

<sup>a</sup> Values in parentheses are for the highest-resolution shell.

**Table S3:** List of plasmids that are used for insect cell expression

| <b>ID</b> | <b>Name</b>                                        | <b>Proteins</b>       |
|-----------|----------------------------------------------------|-----------------------|
| 3720      | pFL_OneStrep-SumoStar-clr4_YFP                     | OSS-Clr4              |
| 4753      | pFL_ph-OneStrepSumo-Cul4 opt_p10-YFP               | OSS-Cul4              |
| 4750      | pFL_ph-OneStrepSumo-Dos1 opt_p10-YFP               | OSS-Dos1              |
| 4722      | pFL_ph-OnestrepSumo-dos2 opt_YFP                   | OSS-Dos2              |
| 3810      | pFL_ph_OneStrepSumo_rik1opt_p10_YFP                | OSS-Rik1              |
| 5394      | pFL_ph_OneStrepSumo-Stc1opt_p10_YFP                | OSS-Stc1              |
| 4729      | pUCDM_ph-Flag-Clr4                                 | Flag-Clr4             |
| 4745      | pUCDM_ph-Flag-Cul4 opt                             | Flag-Cul4             |
| 4738      | pUCDM_ph-Flag-Dos1 opt                             | Flag-Dos1             |
| 4742      | pUCDM_ph-Flag-dos2 opt                             | Flag-Dos2             |
| 4732      | pUCDM_ph-Flag-Rik1 opt                             | Flag-Rik1             |
| 6977      | pFL_SS-TEV-Dos1 opt_p10-YFP                        | OSS-TEV-Dos1          |
| 6981      | pFL_SS-TEV-Dos1 opt 213F_p10-YFP                   | OSS-TEV-Dos1WD        |
| 6984      | pFL_SS-TEV-Dos1 opt 66I_p10-YFP                    | OSS-TEV-Dos1ΔN        |
| 6264      | pFL_ph_OneStrepSumo_rik1opt(A377-L664 del)_p10_YFP | OSS-Rik1AC            |
| 6410      | pUCDM_ph-flag-Dos1 opt 213F                        | Flag-Dos1WD           |
| 6395      | pUCDM_ph-flag-Dos1 opt 66I                         | Flag-Dos1ΔN           |
| 11489     | pUCDM_ph-Flag-Dos1opt(del531-546)                  | Flag-Dos1ΔLIV         |
| 11463     | pUCDM_ph-FLAG-Dos1opt(T508A,D509A)                 | Flag-Dos1 T508A/D509A |
| 11457     | pUCDM-ph-FLAG-Dos1opt(I491A,N492A)                 | Flag-Dos1 I491A/N492A |
| 11452     | pUCDM-ph-FLAG-Dos1opt(K489A,D490A)                 | Flag-Dos1 K489A/D490A |
| 11488     | pFL_SS-Dos1opt(del531-546)                         | OSS- Dos1ΔLIV         |
| 11462     | pFL_SS-Dos1opt(T508A,D509A)                        | OSS- Dos1 T508A/D509A |

|       |                              |                       |
|-------|------------------------------|-----------------------|
| 11456 | pFL_SS-Dos1opt(I491A,N492A)  | OSS- Dos1 I491A/N492A |
| 11449 | pFL_SS-Dos1opt (K489A,D490A) | OSS- Dos1 K489A/D490A |
| 7124  | Cre fusion of 3720&4745      | OSS-Clr4, Flag-Cul4   |
| 7125  | Cre fusion of 3720&4738      | OSS-Clr4, Flag-Dos1   |
| 7126  | Cre fusion of 3720&4742      | OSS-Clr4, Flag-Dos2   |
| 7127  | Cre fusion of 3720&4732      | OSS-Clr4, Flag-Rik1   |
| 7128  | Cre fusion of 4753&4729      | OSS-Cul4, Flag-Clr4   |
| 7129  | Cre fusion of 4753&4738      | OSS-Cul4, Flag-Dos1   |
| 7130  | Cre fusion of 4753&4742      | OSS-Cul4, Flag-Dos2   |
| 7131  | Cre fusion of 4753&4732      | OSS-Cul4, Flag-Rik1   |
| 7132  | Cre fusion of 4750&4729      | OSS-Dos1, Flag-Clr4   |
| 7133  | Cre fusion of 4750&4745      | OSS-Dos1, Flag-Cul4   |
| 7134  | Cre fusion of 4750&4742      | OSS-Dos1, Flag-Dos2   |
| 7135  | Cre fusion of 4750&4732      | OSS-Dos1, Flag-Rik1   |
| 7136  | Cre fusion of 4722&4729      | OSS-Dos2, Flag-Clr4   |
| 7137  | Cre fusion of 4722&4745      | OSS-Dos2, Flag-Cul4   |
| 7138  | Cre fusion of 4722&4738      | OSS-Dos2, Flag-Dos1   |
| 7139  | Cre fusion of 4722&4732      | OSS-Dos2, Flag-Rik1   |
| 7140  | Cre fusion of 3810&4729      | OSS-Rik1, Flag-Clr4   |
| 7141  | Cre fusion of 3810&4745      | OSS-Rik1, Flag-Cul4   |
| 7142  | Cre fusion of 3810&4738      | OSS-Rik1, Flag-Dos1   |
| 7143  | Cre fusion of 3810&4742      | OSS-Rik1, Flag-Dos2   |
| 7144  | Cre fusion of 5394&4729      | OSS-Stc1, Flag-Clr4   |
| 7145  | Cre fusion of 5394&4745      | OSS-Stc1, Flag-Cul4   |
| 7146  | Cre fusion of 5394&4738      | OSS-Stc1, Flag-Dos1   |
| 7147  | Cre fusion of 5394&4742      | OSS-Stc1, Flag-Dos2   |

|       |                                                |                                   |
|-------|------------------------------------------------|-----------------------------------|
| 7148  | Cre fusion of 5394&4732                        | OSS-Stc1, Flag-Rik1               |
| 6745  | Strep-sumo-Rik1(A377-L664 del)&Flag-Dos1 cre   | OSS-Rik1AC, Flag-Dos1             |
| 6746  | Strep-sumo-Rik1(A377-L664 del)&Flag-Dos1 213F  | OSS-Rik1AC, Flag-Dos1WD           |
| 6747  | Strep-sumo-Rik1(A377-L664 del)&Flag-Dos1 66I c | OSS-Rik1AC, Flag-Dos1ΔN           |
| 12599 | OSS-Rik1opt_AC+Flag-Dos1opt(del531-546)        | OSS-Rik1AC, Flag-Dos1ΔLIV         |
| 12598 | OSS-Rik1opt_AC+FLAG-Dos1opt(I491A,N492A)       | OSS-Rik1AC, Flag-Dos1 I491A/N492A |
| 12597 | OSS-Rik1opt_AC+FLAG-Dos1opt(T508A,D509A)       | OSS-Rik1AC, Flag-Dos1 T508A/D509A |
| 12596 | OSS-Rik1opt_AC+Flag-Dos1opt(K489A,D490A)       | OSS-Rik1AC, Flag-Dos1 K489A/D490A |
| 12595 | OSS-Dos1opt(I491A,N492A)+Flag-Clr4             | OSS-Dos1 I491A/N492A, Flag-Clr4   |
| 12594 | OSS-Dos1opt(T508A,D509A)+Flag-Clr4             | OSS-Dos1 T508A/D509A, Flag-Clr4   |
| 12425 | OSS-Dos1opt (K489A,D490A)+Flag-Clr4            | OSS-Dos1 K489A/D490A, Flag-Clr4   |
| 12424 | OSS-Dos1(delLIV)+Flag-Clr4                     | OSS-Dos1 ΔLIV, Flag-Clr4          |
| 11661 | OSS-Dos1(del531-546)+Flag-Dos2                 | OSS-Dos1 ΔLIV, Flag-Dos2          |
| 11641 | OSS-Dos1(T508A,D509A)+Flag-Dos2                | OSS-Dos1 T508A/D509A, Flag-Dos2   |
| 11637 | OSS-Dos1(I491A,N492A)+Flag-Dos2                | OSS-Dos1 I491A/N492A, Flag-Dos2   |
| 11633 | OSS-Dos1(K489A,D490A)+Flag-Dos2                | OSS-Dos1 K489A/D490A, Flag-Dos2   |

**Table S4:** List of plasmids that were used to express Dos1 mutants in *S.pombe* strains.

| <b>ID</b> | <b>Name</b>                      |
|-----------|----------------------------------|
| 10195     | pREP41-HA-null                   |
| 10246     | pREP41-HA-Dos1                   |
| 10249     | pREP41-HA-Dos1-L II(288G300)     |
| 10252     | pREP41-HA-Dos1(R518A)            |
| 10257     | pREP41-HA-Dos1(R576A)            |
| 10262     | pREP41-HA-Dos1(T495I)            |
| 10275     | pREP41-HA-Dos1-L I(260-GG-270)   |
| 10281     | pREP41-HA-Dos1-L III(414G422)    |
| 10284     | pREP41-HA-Dos1-L IV-v2(530GG547) |
| 10289     | pREP41-HA-Dos1-L IV(534GG547)    |
| 10294     | pREP41-HA-Dos1(1-618)            |
| 10298     | pREP41-HA-Dos1(1-212)            |
| 10302     | pREP41-HA-Dos1(194-638)          |
| 10349     | pREP41-HA-Dos1(H344A,K345A)      |
| 10354     | pREP41-HA-Dos1(E397A)            |
| 10359     | pREP41-HA-Dos1(F416A)            |
| 10371     | pREP41-HA-Dos1(Y450A)            |
| 10374     | pREP41-HA-Dos1(H493A)            |
| 10379     | pREP41-HA-Dos1(N550A)            |
| 10384     | pREP41-HA-Dos1(Q553A)            |
| 10389     | pREP41-HA-Dos1(N559A)            |
| 10394     | pREP41-HA-Dos1(Y594A)            |
| 10399     | pREP41-HA-Dos1(E599A)            |

|       |                              |
|-------|------------------------------|
| 10479 | pREP41-HA-Dos1(N237A,E238A)  |
| 10507 | pREP41-HA-Dos1(H278A)        |
| 10512 | pREP41-HA-Dos1(T301A)        |
| 10516 | pREP41-HA-Dos1(D304A)        |
| 10519 | pREP41-HA-Dos1(T3401A,D341A) |
| 10522 | pREP41-HA-Dos1(K359A)        |
| 10528 | pREP41-HA-Dos1(F626A,F629A)  |
| 10531 | pREP41-HA-Dos1(E628A,E633A)  |
| 10554 | pREP41-HA-Dos1(173-638)      |
| 10557 | pREP41-HA-Dos1(154-638)      |
| 10560 | pREP41-HA-Dos1(139-638)      |
| 10580 | pREP41-HA-Dos1(F319A)        |
| 10583 | pREP41-HA-Dos1(D320A,N321A)  |
| 10586 | pREP41-HA-Dos1(E385A)        |
| 10589 | pREP41-HA-Dos1(E388A,K389A)  |
| 10593 | pREP41-HA-Dos1(T487A,Q488A)  |
| 10596 | pREP41-HA-Dos1(I491A,N492A)  |
| 10599 | pREP41-HA-Dos1(T508A,D509A)  |
| 10605 | pREP41-HA-Dos1(K489A,D490A)  |
| 11051 | pREP41-HA-Dos1(V244A)        |
| 11093 | pREP41-HA-Dos1(V244A, T260A) |
| 11272 | pREP41-HA-Dos1deltaN(66-638) |
| 11275 | pREP41-HA-Dos1WD(213-638)    |
| 11364 | pREP41-HA-Dos1(L465A)        |

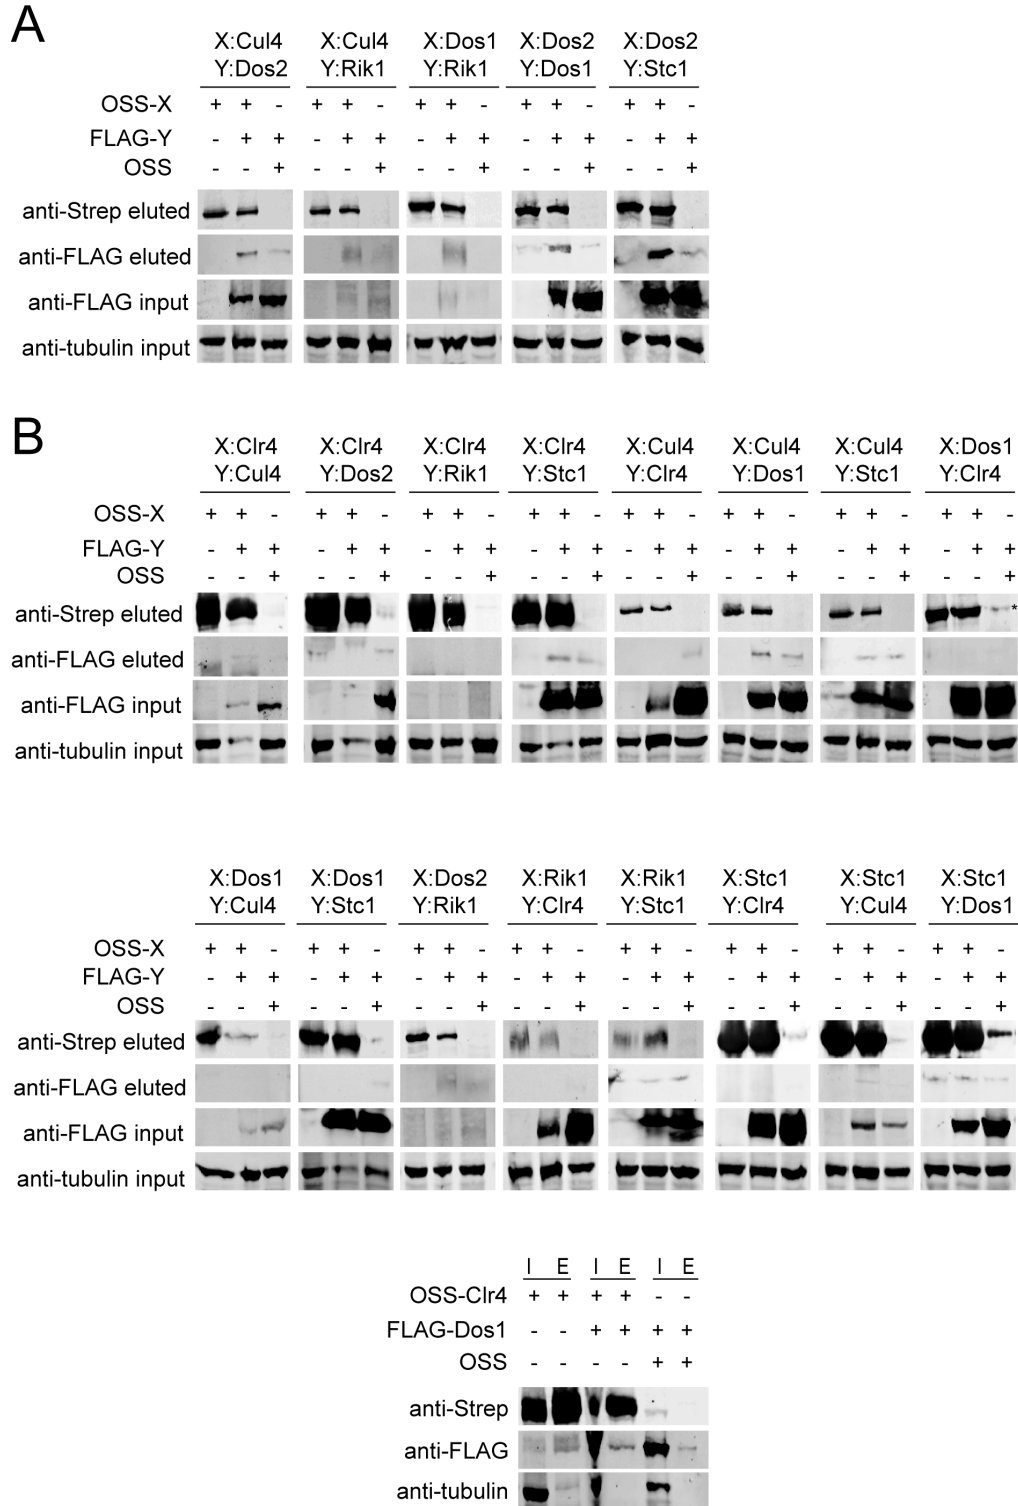

**Figure S1.** Additional pairwise interaction screens to those shown in Fig.1A, but used for the summary in Fig. 1B. (A) Pairs classified as interacting. (B) Pairs classified as non interacting. OSS and FLAG tagged single CLRC components were co-expressed and pulled down with StrepTactin beads (see SI Materials & Methods).

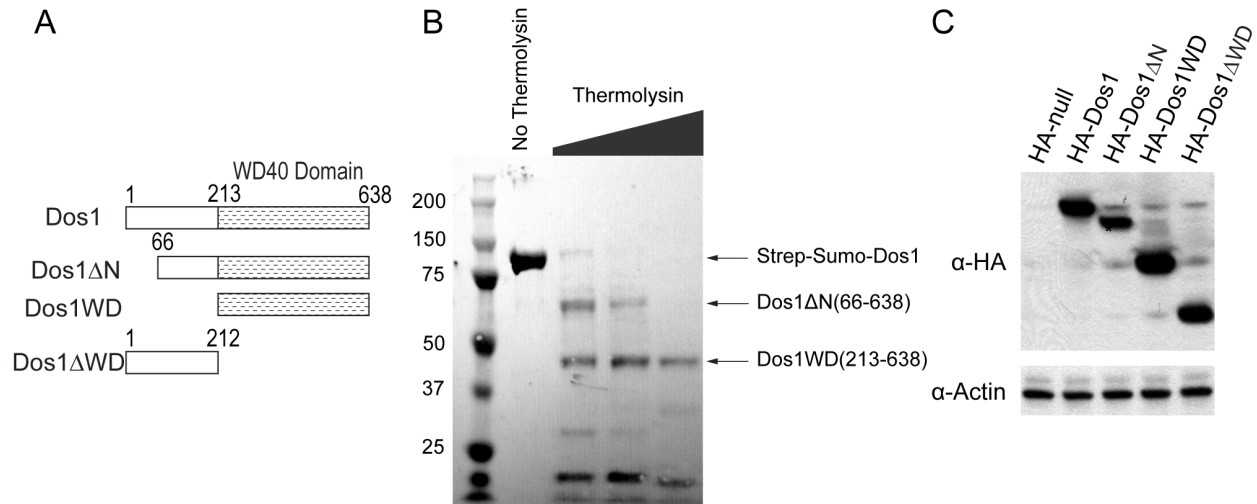

**Figure S2. Limited proteolysis of Dos1 identified two distinct fragments.** (A) Domain architecture of Dos1 fragments which were identified in limited proteolysis experiments and used in the rescue experiments. (B) N-terminal sequences of Dos1 $\Delta$ N (66-638) and Dos1WD (213-638) were identified by Edman Sequencing at Protein Core Facility in Columbia University. (C) Protein levels of the Dos1 truncations as indicated detected by western using HA tag antibody and actin as a loading control. \* indicates the non-specific band from HA antibody around the same size as Dos1.



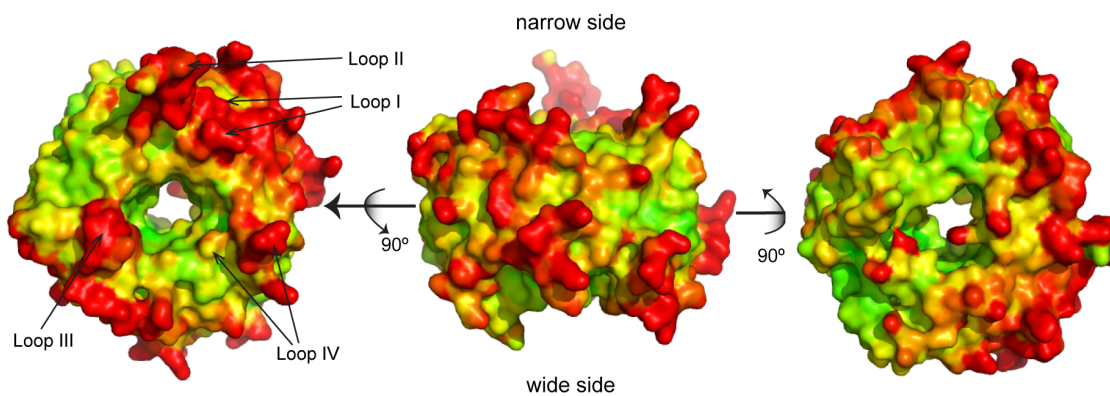

**Figure S3. Flexible loops and regions on the narrow site of Dos1WD.** Surface representation of Dos1WD, colored based on crystallographic *B*-factor values (yellow: low, green: mid and red: high). High *B* factors correlate with increased flexibility of the residues.

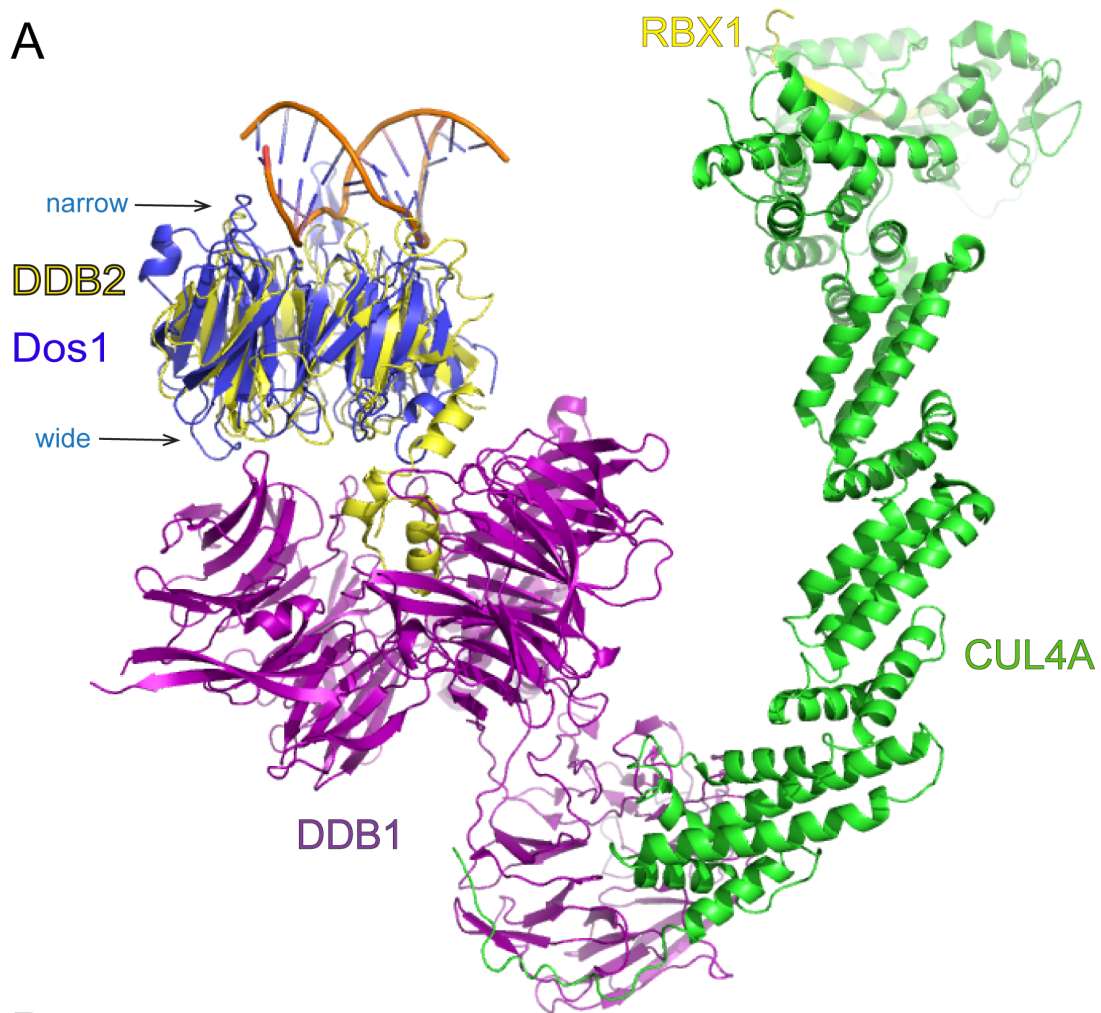

**B**

|                          | CLRC | CRL4  |
|--------------------------|------|-------|
| E3 ligase                | Cul4 | CUL4A |
| 3 propeller adaptor      | Rik1 | DDB1  |
| DCAF                     | Dos1 | DDB2  |
| Methyltransferase        | Clr4 | -     |
| Unknown function         | Dos2 | -     |
| RITS interacting subunit | Stc1 | -     |
| Target                   | ?    | DNA   |

**Figure S4. Superposition of Dos1WD and DDB2 in the CRL4<sup>DDB2</sup> complex structure (PDB ID: 4a0k).** (A) The alignment identifies the Rik1 binding surface and a putative target binding surface on Dos1. (B) Equivalent CLRC and CRL4<sup>DDB2</sup> subunits.

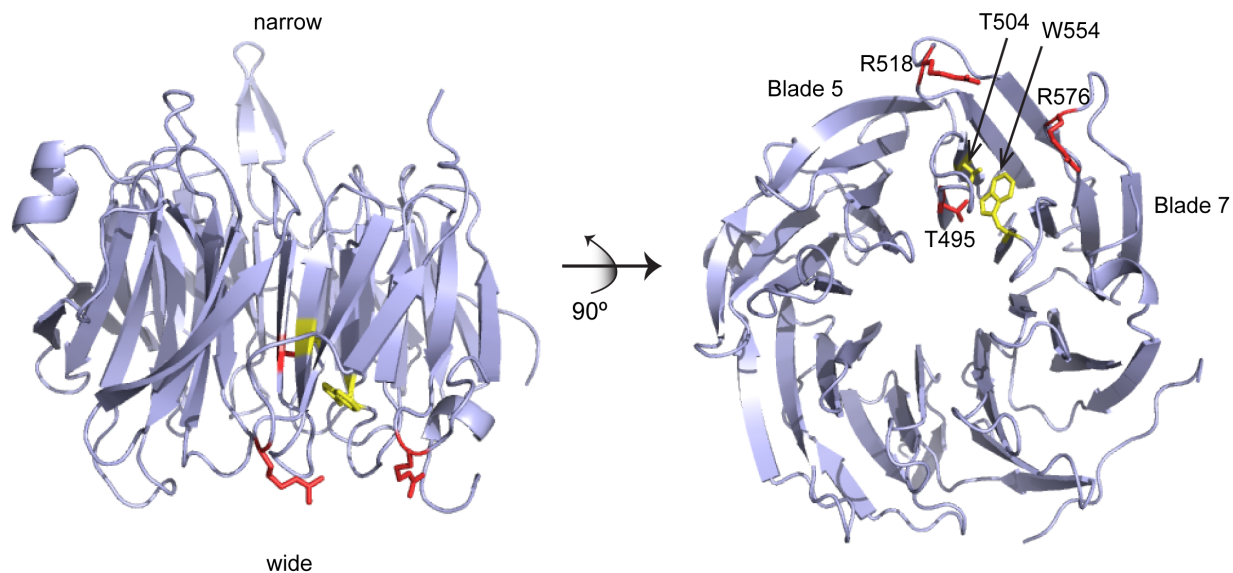

**Figure S5. Location of Dos1 point mutants that affect Rik1 binding.** Residues that are mutated (Thr495, Arg518, and Arg576) and previously shown to affect Rik1 binding (19) are shown in red, and residues that stabilize Thr495 conformation (Thr504 and Trp554) are shown in yellow.

A

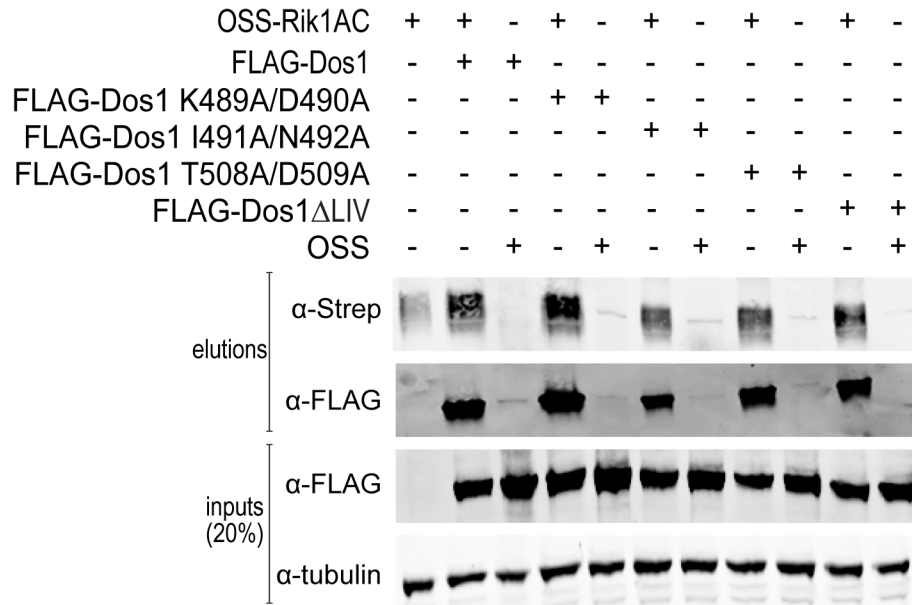

B

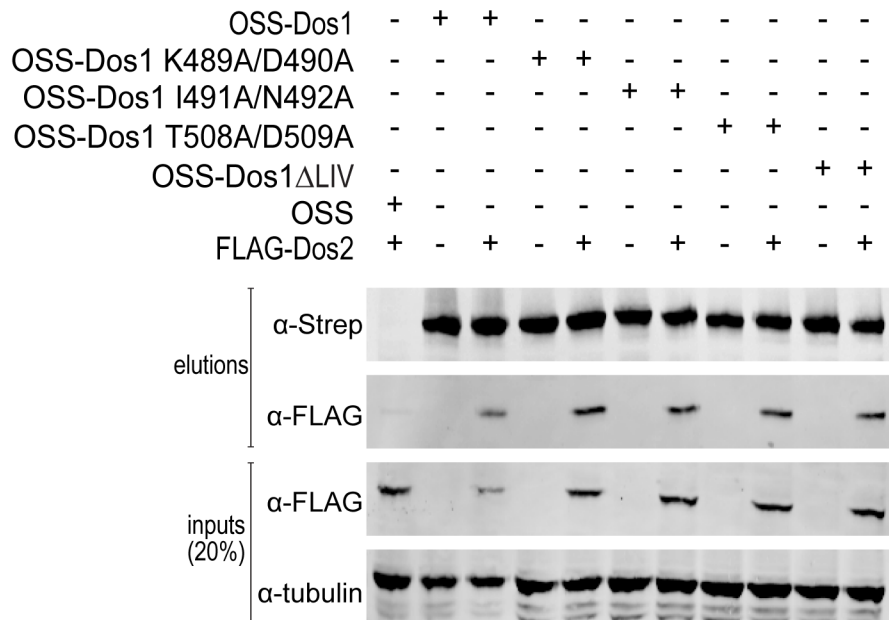

**Figure S6. Dos1 mutants retain interactions with Rik1 and Dos2.** Streptactin beads pulldown assays from insect-cell coexpression of (A) OSS-Rik1AC with various FLAG-tagged Dos1 mutants and (B) OSS-Dos1 mutants with FLAG-Dos2.

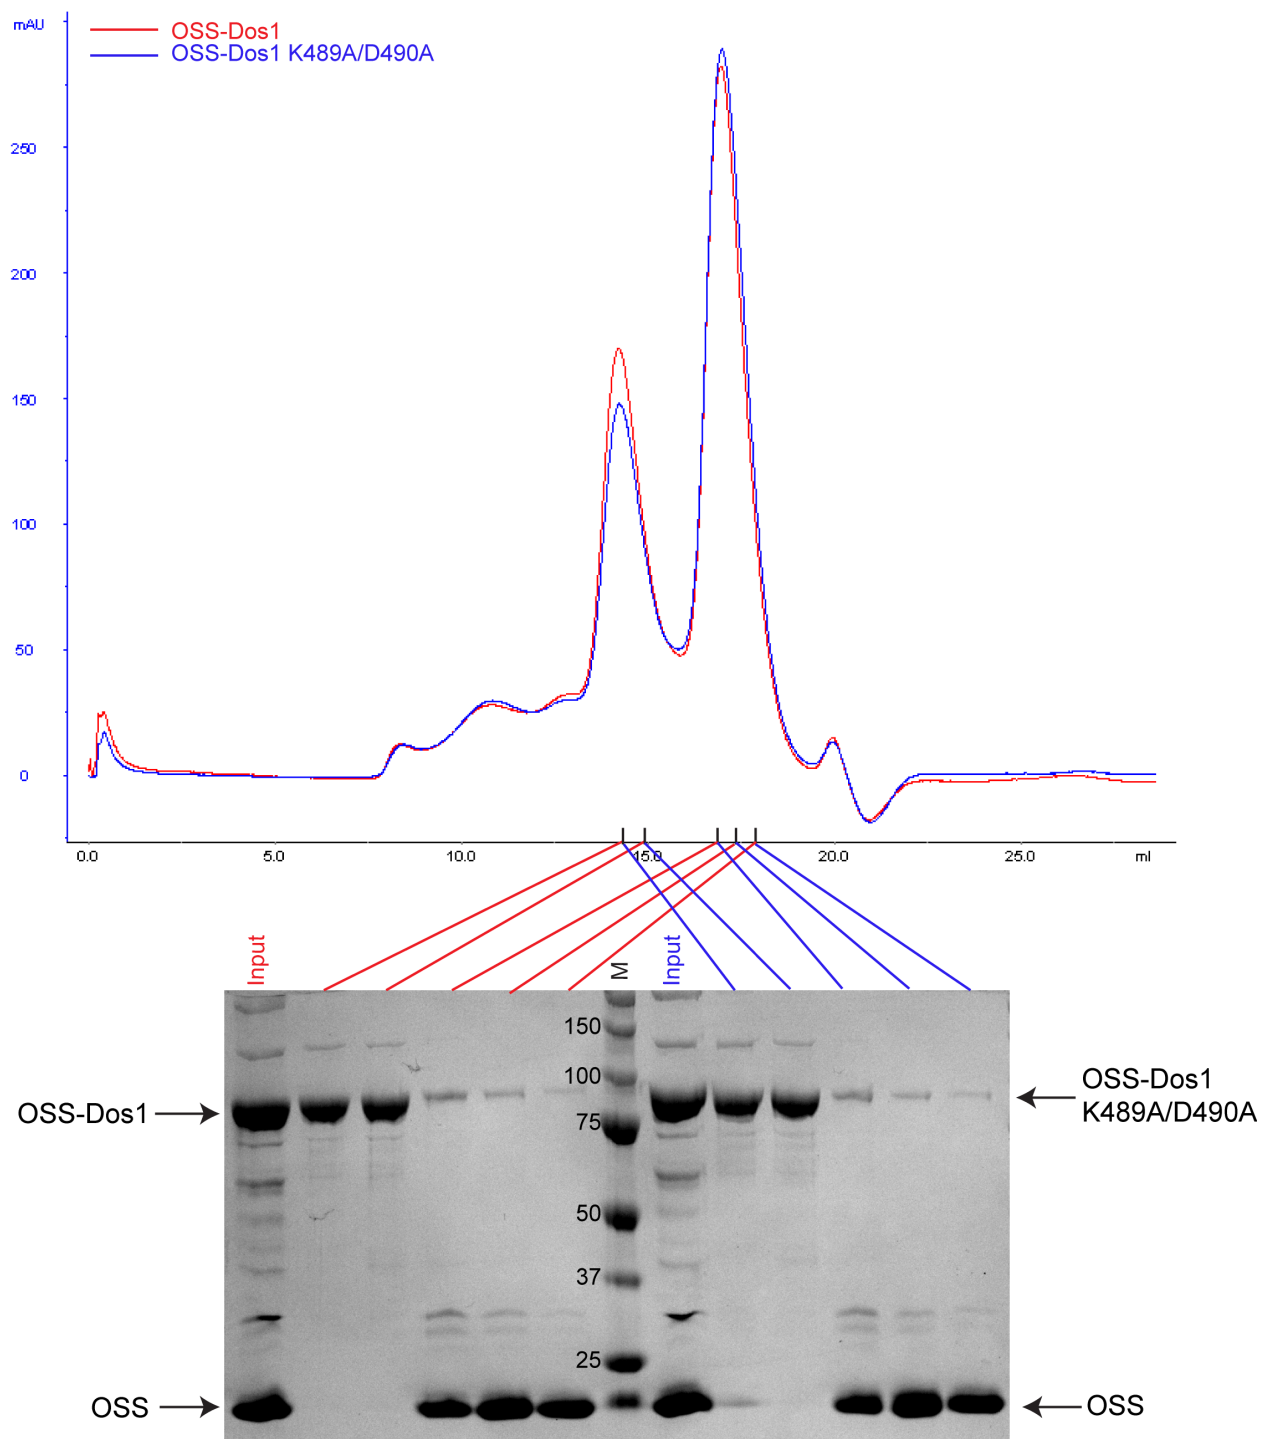

**Figure S7. Size exclusion chromatography of a representative mutant and of wild type Dos1.** OSS-Dos1 and OSS-Dos1 K489A/K490A behave identically on a Superdex 200 column.

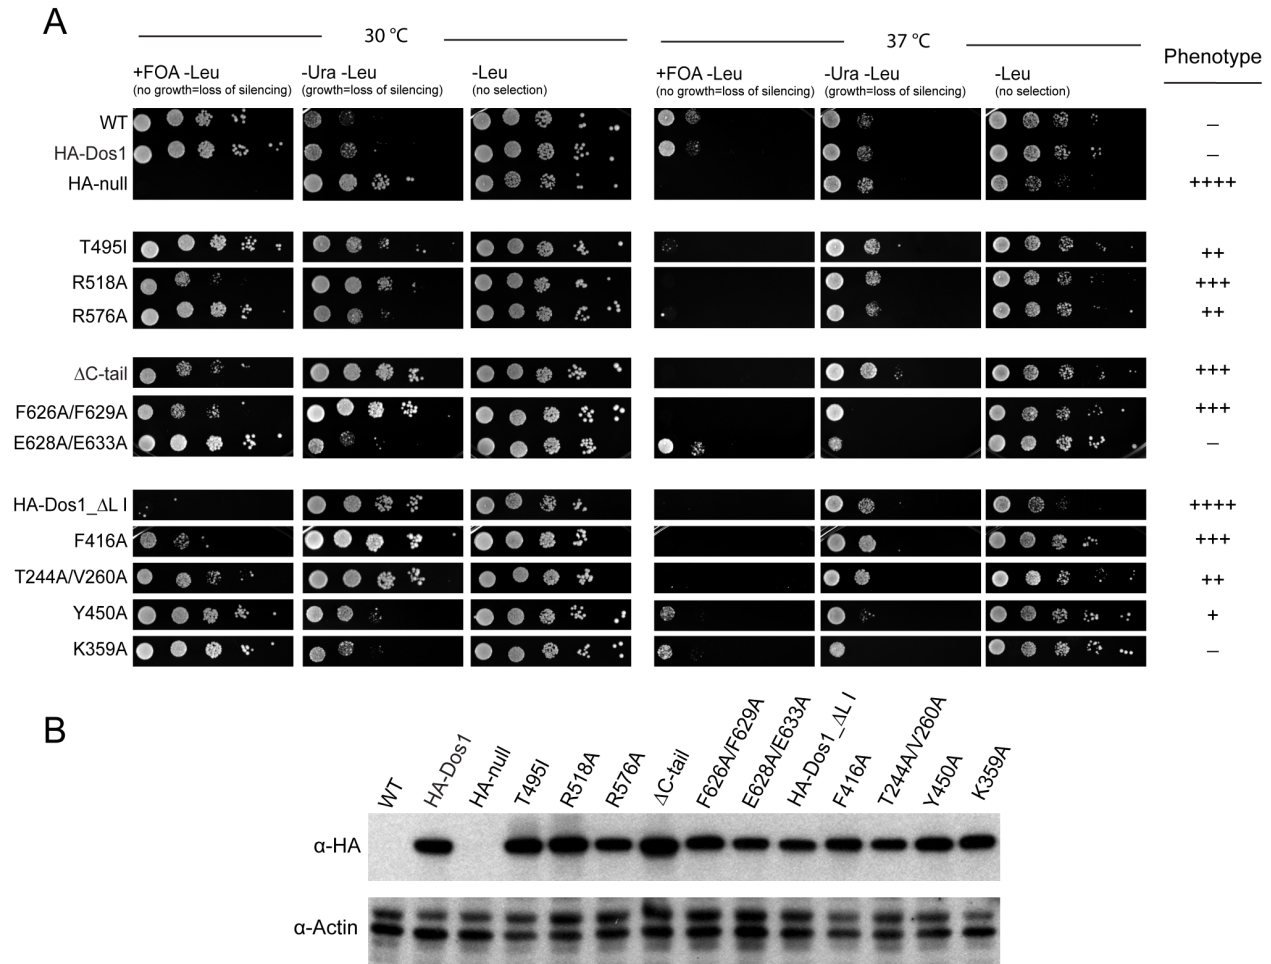

**Figure S8. Classification of comparative growth assay phenotypes.** (A) Comparative growth assays of serially diluted *dos1* null strain with the centromeric *otr1R::ura4* reporter expressing Dos1 mutants including the those previously reported (19), the C-terminal latch and representative mutants for each class of phenotype. Strains were examined for growth on a PMG medium lacking leucine and supplemented with 5-FOA (+FOA -Leu), PMG medium lacking uracil and leucine (-Ura -Leu) and PMG medium lacking leucine (-Leu) both at 30 °C and 37 °C. Cells were always grown on PMG medium lacking leucine to select for a Dos1 expressing plasmid. (B) Protein levels of the mutants as indicated detected by western using an HA tag antibody and actin antibody as a loading control.



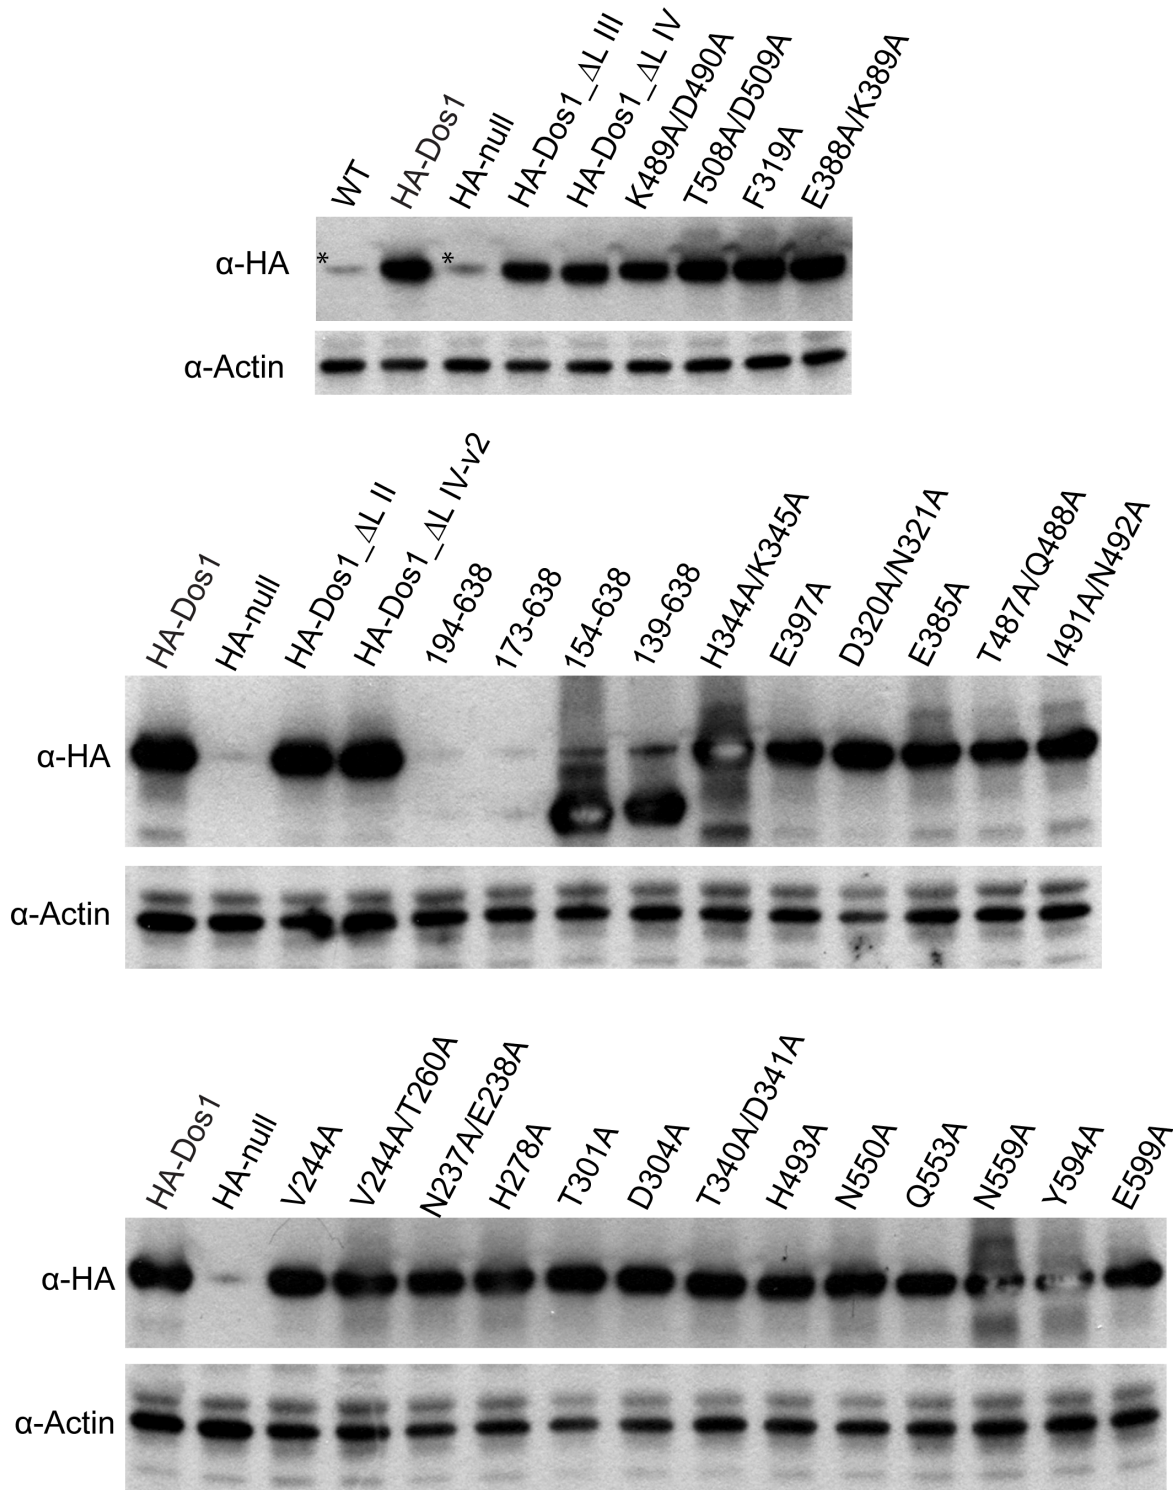

**Figure S9. Expression levels of Dos1 constructs used in silencing assays in *S. pombe*.** Cells expressing corresponding Dos1 mutants were TCA precipitated and subjected to western blotting using anti-HA antibody and actin antibody as a loading control.

\* indicates a non-specific band from HA antibody around the same size as Dos1.

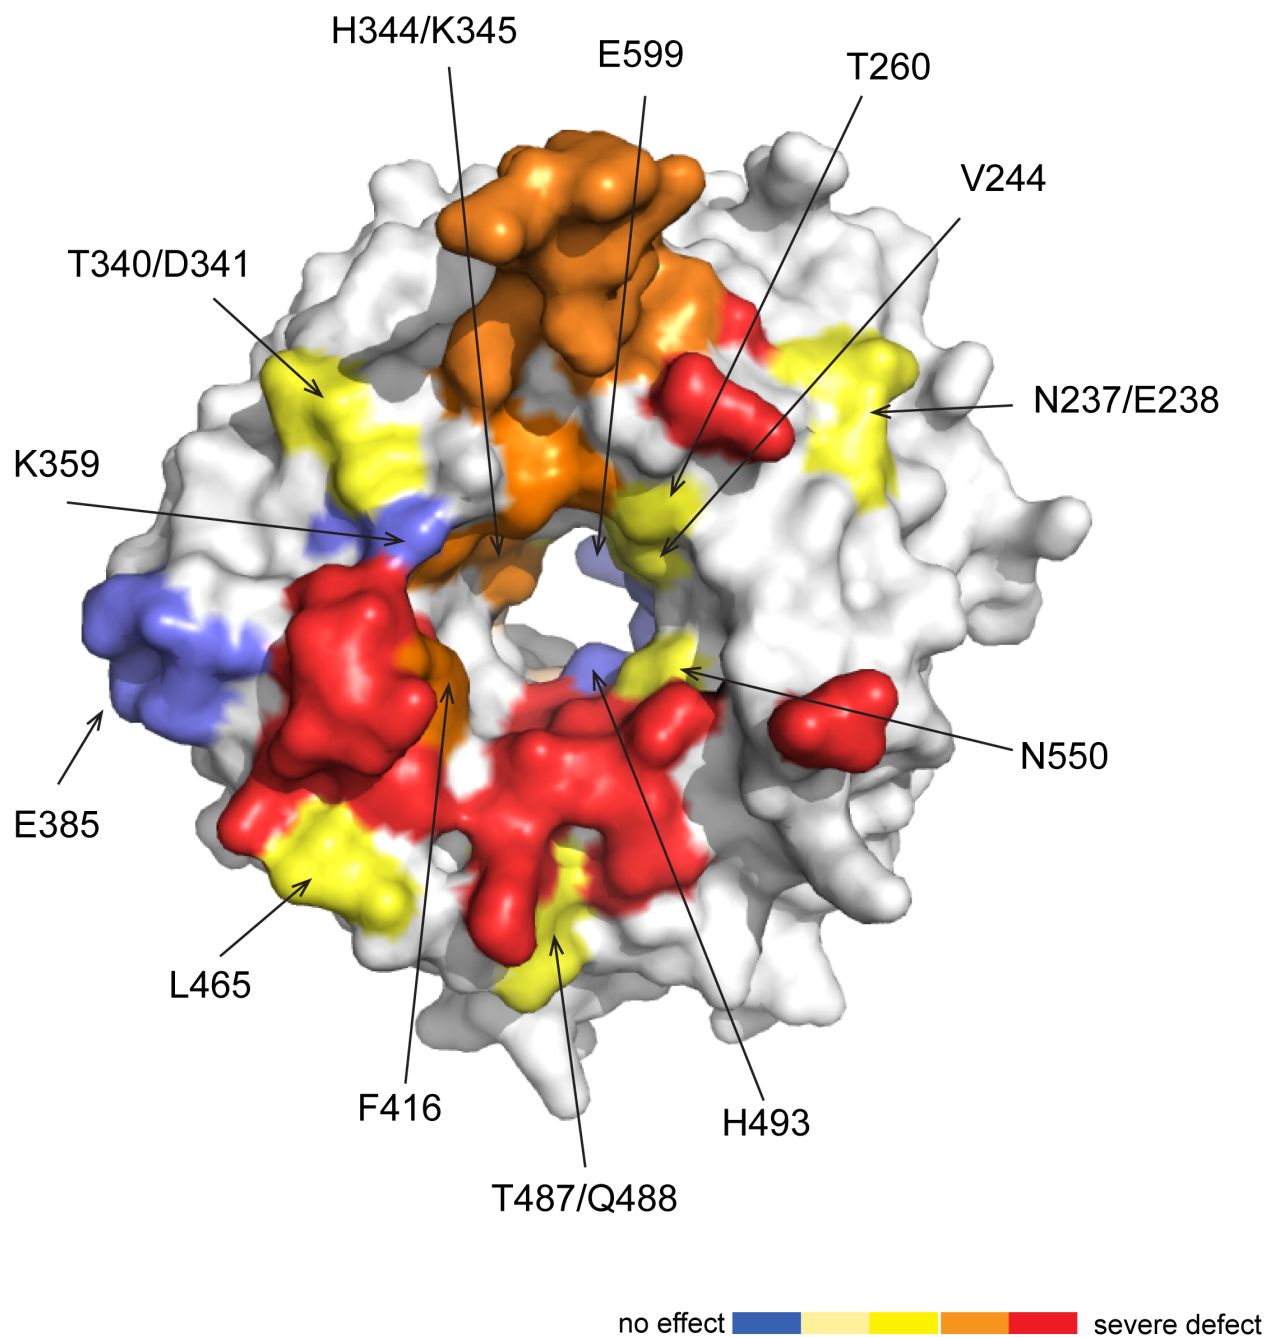

**Figure S10. A surface of Dos1 is important for heterochromatic silencing, but not for interaction with known CLRC components.** Surface representation of Dos1WD mapped mutations with the degree of the silencing defect (red: severe defect, orange: less severe defect, yellow: mild defect, light yellow: very mild silencing defect, blue: no effect on  $ura4^+$  silencing).
